# Supplementary material
Source: Springer Nature journal article supplement (https://www.springermedizin.de/resource/supplementary/12916_2009_236_MOESM1_ESM.pdf/9599460)
Supplement: MOESM1 [file 9599460]

## Predisposed individuals

- Female [16]
- Overactive [19]
- Prior psych disorder [16]
- Personality factors [22]
- Early childhood illness [23]
- Increased use of doctors [33]

## Triggering event

- Viral infection [24]
- Stress [22]
- Other

**FATIGUE**

## Maintaining factors

- Prolonged bed rest [25]
- Boom & bust activity [27, 28]
- Biological changes [32, 34]

**CFS**
